# Supplementary material
Source: publisher site journal article supplement (https://www.dovepress.com/article/470617)
Supplement: Supplementary file 1 [file get_supplementary_file.php]

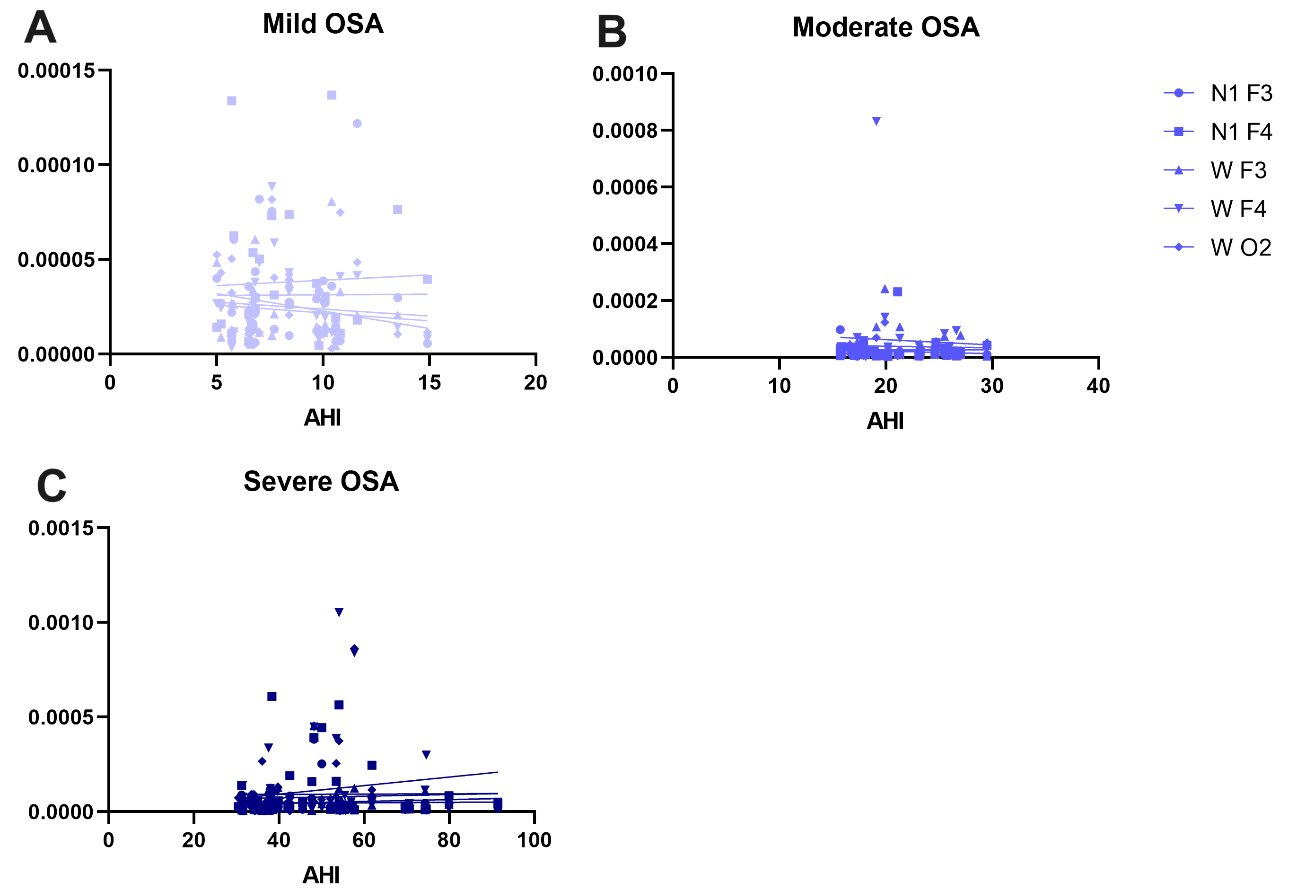


**Supplementary Figure 1** Correlation analysis between AHI and the theta-beta PAC-MI during N1 sleep and wakefulness period revealed a significant difference between PAC-MI and AHI during wakefulness.

(**A**) Correlation with AHI and the theta-beta PAC-MI of N1 sleep and Wakefulness period in the mild OSA group. (**B**) Correlation with AHI and the theta-beta PAC-MI of N1 sleep and Wakefulness period in the moderate OSA group. (**C**) Correlation with AHI and the theta-beta PAC-MI of N1 sleep and wakefulness period in the severe OSA group.
